# Supplementary material for: Low viscosity-PLGA scaffolds by compressed CO2foaming for growth factor delivery
Source: Royal Society of Chemistry journal article supplement (doi:10.1039/c6ra09369h), 2016-01-01
Supplement: c6ra09369h1.pdf [file c6ra09369h1.pdf]

ELECTRONIC SUPPORTING INFORMATION

**Low viscosity-PLGA scaffolds by compressed CO<sub>2</sub> foaming for growth factors delivery<sup>§</sup>**

L. Diaz-Gomez<sup>a</sup>, F. Yang<sup>b</sup>, J.A. Jansen<sup>b</sup>, A. Concheiro<sup>a</sup>, C. Alvarez-Lorenzo<sup>a\*</sup>, C.A. García-González<sup>a\*</sup>

<sup>a</sup> Departamento de Farmacia y Tecnología Farmacéutica, Facultad de Farmacia, Universidade de Santiago de Compostela, E-15782 Santiago de Compostela, Spain.

<sup>b</sup> Department of Biomaterials, Radboud University Medical Center, 6500 HB Nijmegen, The Netherlands.

*\*Corresponding authors: carmen.alvarez.lorenzo@usc.es; phone: +34 881 815239; fax: +34 981 547148; carlos.garcia@usc.es; phone: +34 881 815252; fax: +34 981 547148.*

<sup>§</sup>The work described in this paper is the subject of patent application P201531087 filed by Universidade de Santiago de Compostela.

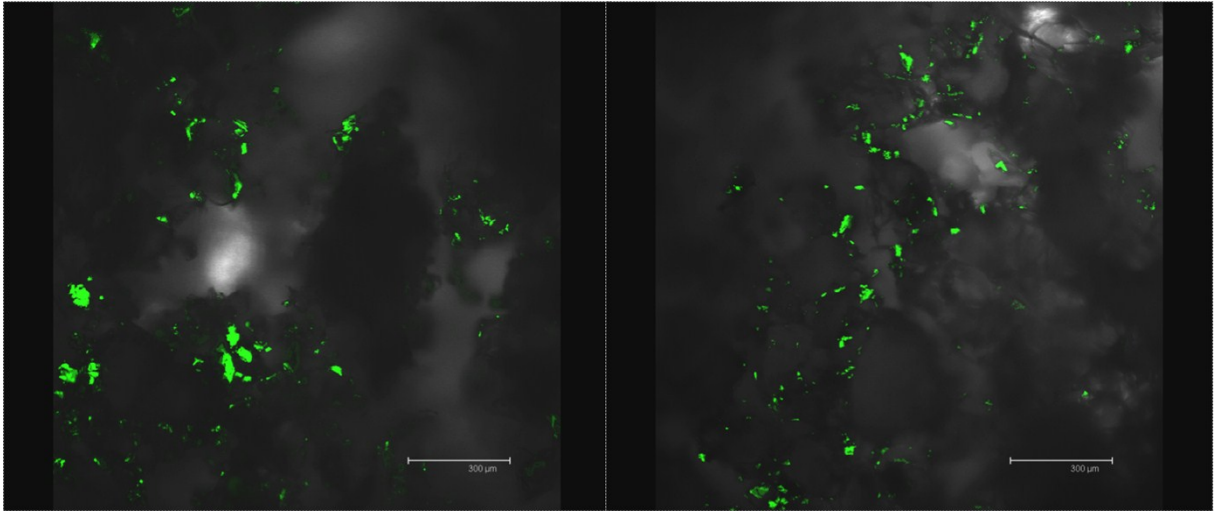

**Figure S1.** Protein distribution within scaffolds processed by compressed CO<sub>2</sub> foaming as observed under confocal microscopy of cross sections of PCGL:Lys-FITC (left) and PCGL:StO:Lys-FITC (right). Scale bar: 300 μm.

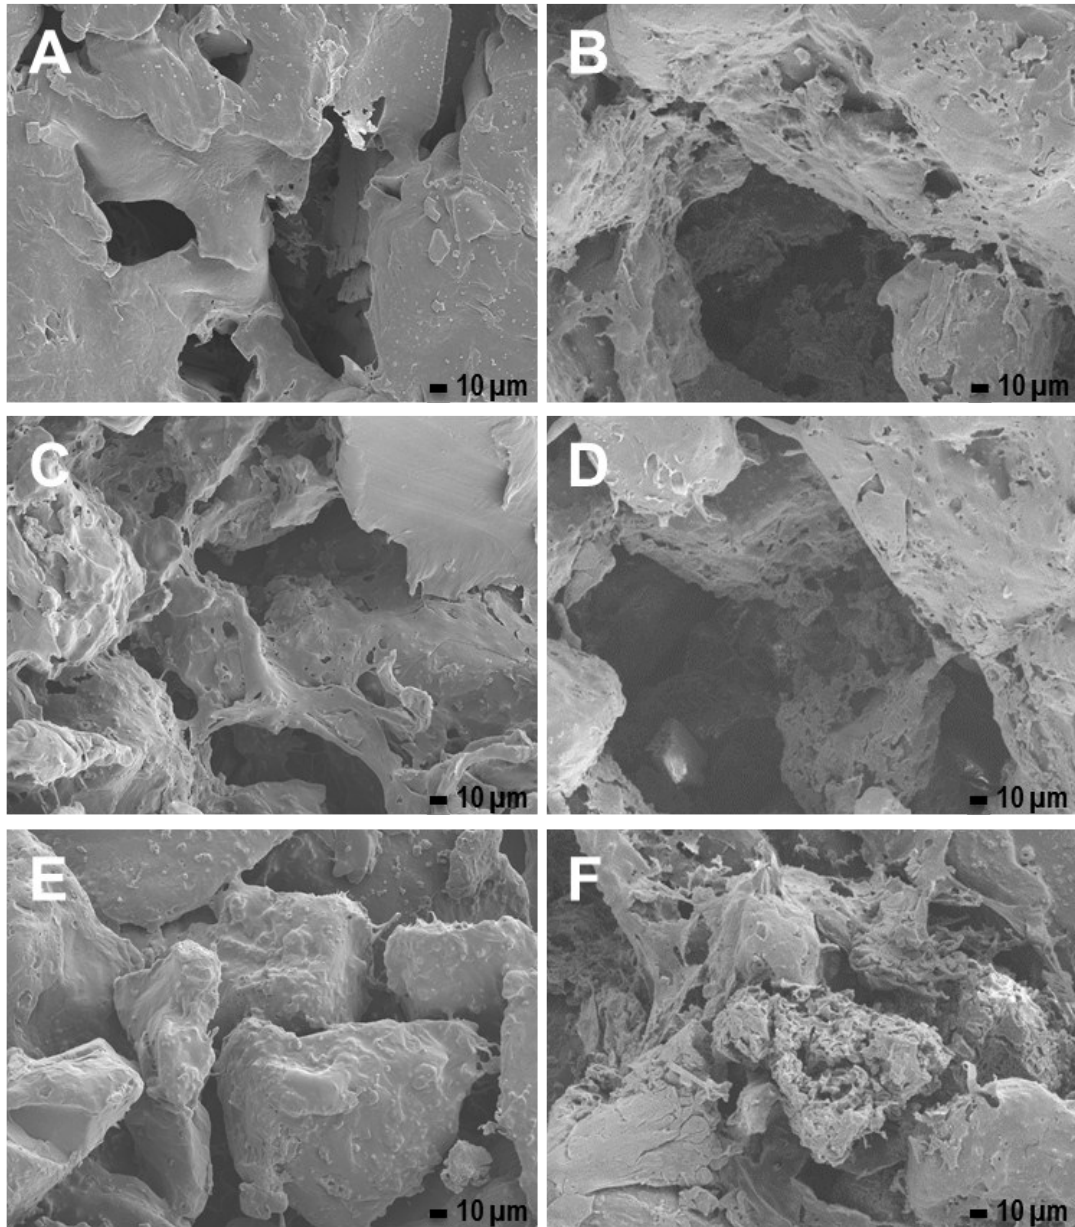

**Figure S2.** SEM micrographs of the scaffolds cultured in PBS for 60 days (A: PCGL; B: PCGL-IPRP; C: PCGL-StO; D: PCGL-StO-IPRP, E: PCGL-StL; and F: PCGL-StL-IPRP).

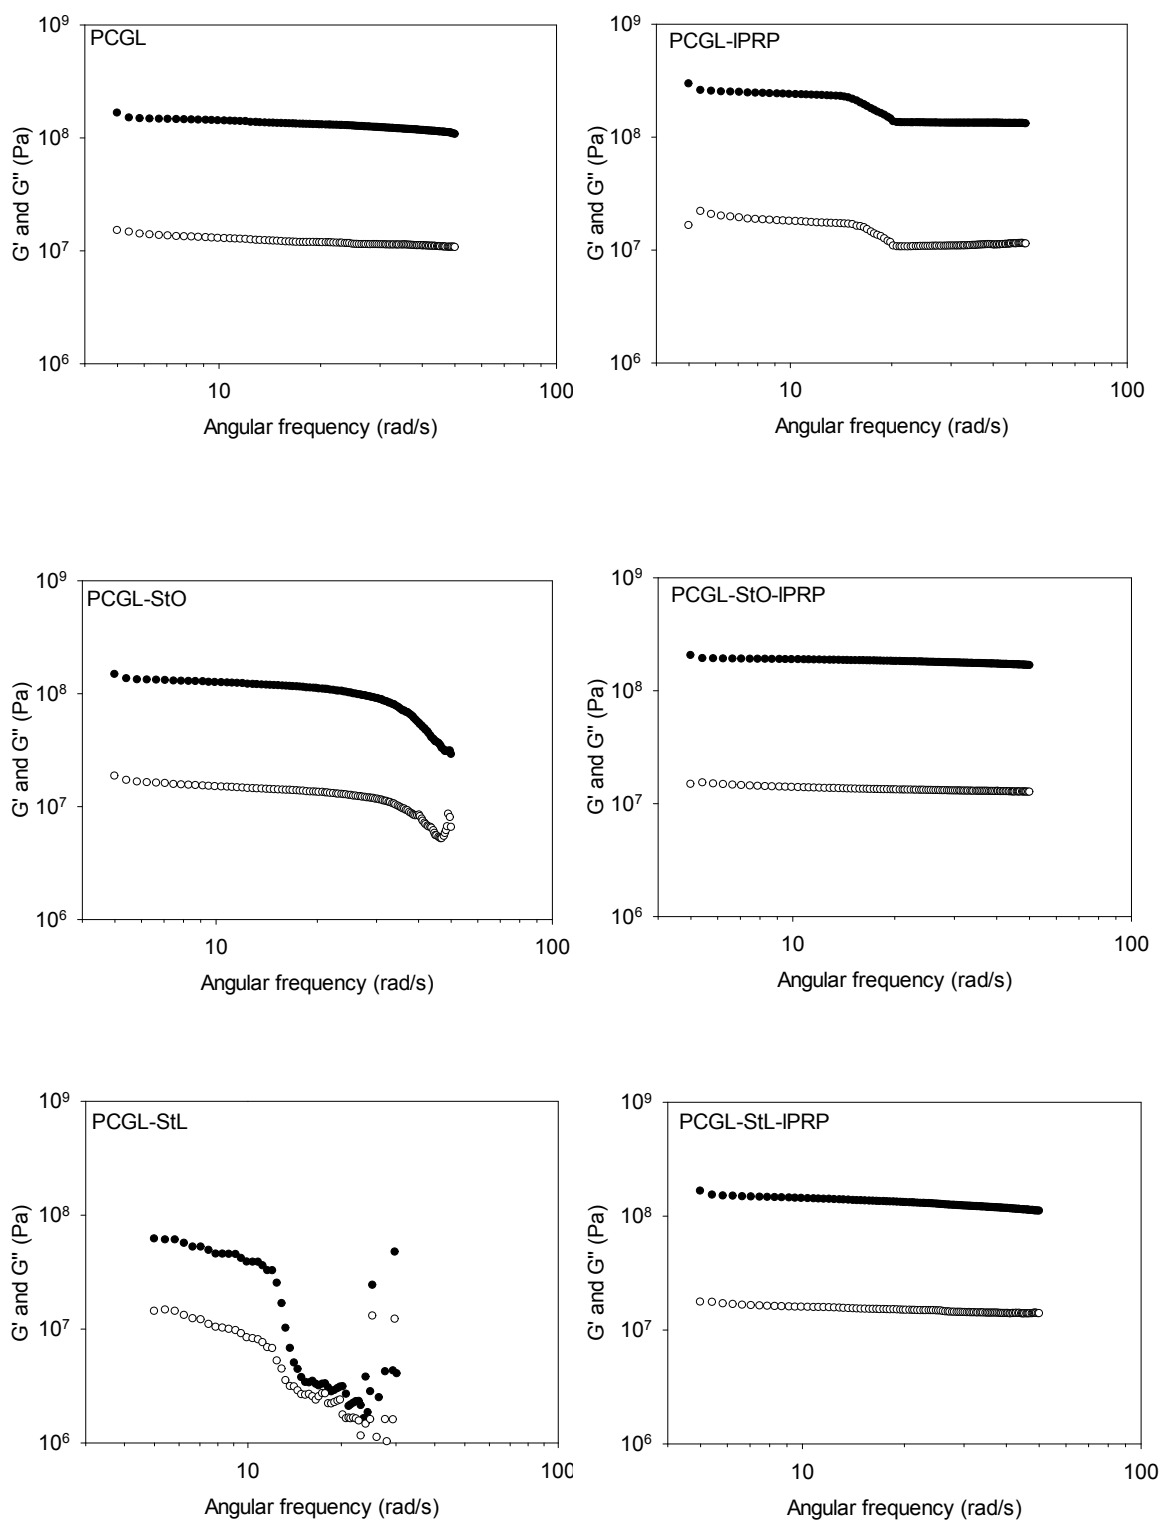

**Figure S3.** Storage ( $G'$ , solid symbols) and loss ( $G''$ , open symbols) moduli of PCGL scaffolds at 37 °C.

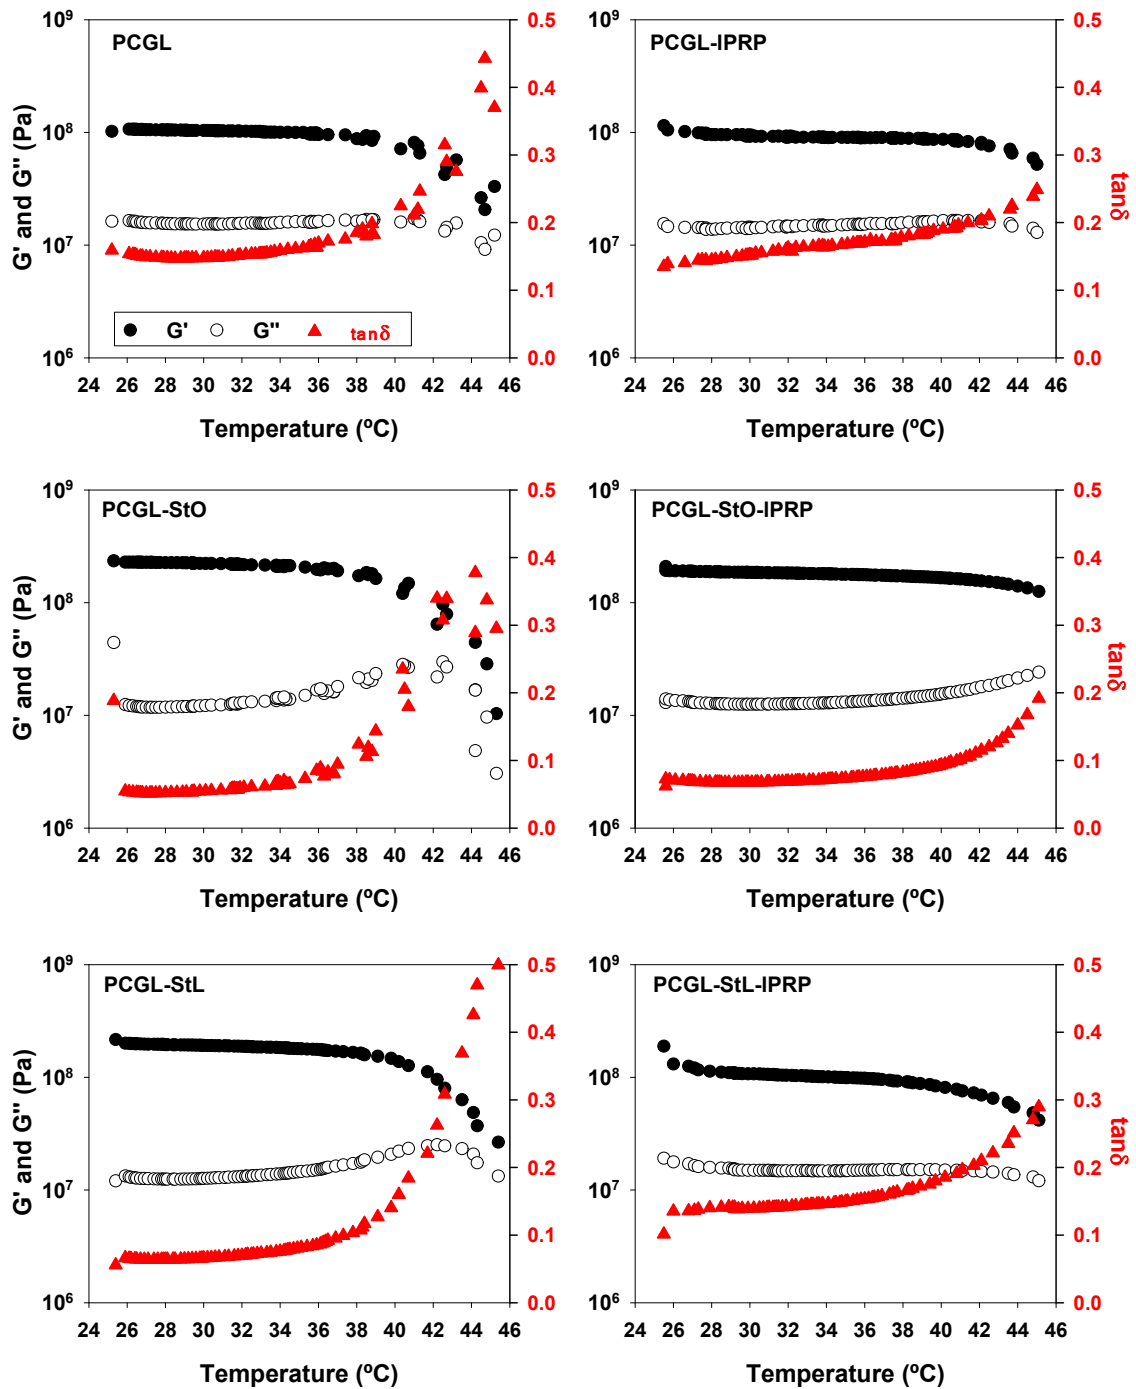

**Figure S4.** Dependence of storage ( $G'$ , solid symbols) and loss ( $G''$ , open symbols) moduli of PCGL scaffolds as a function of temperature, for 0.5% strain.
